# Supplementary material
Source: MDPI journal article supplement (https://www.mdpi.com/2504-477X/5/12/311)
Supplement: s1 [file s1]

## Supplementary Material A: Predictions of Unknown Compositions

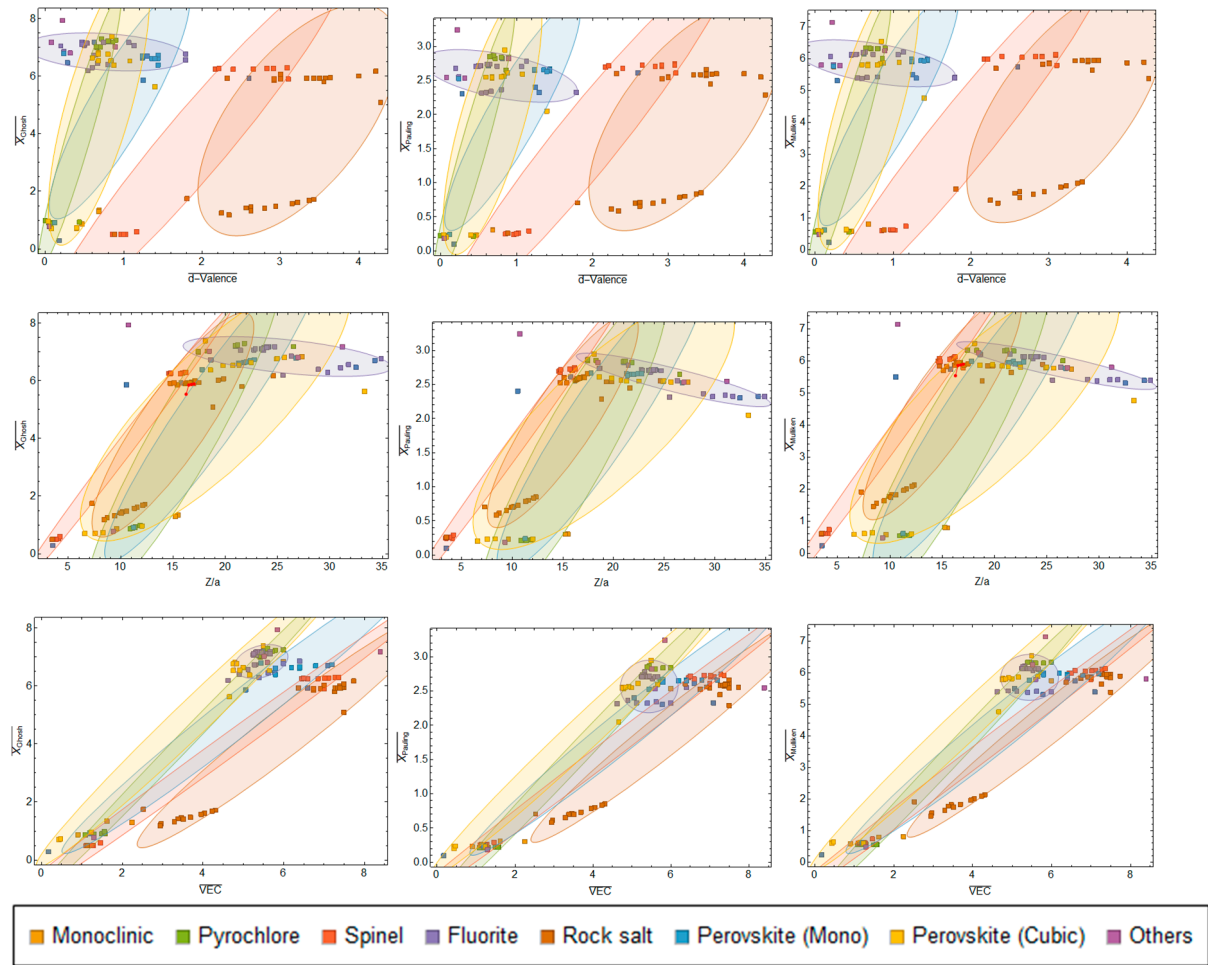

**Figure S1.** Biplots and encapsulating regions for  $3^2$  biplots of rules-of-mixtures Ghosh, Pauling, and Mulliken electronegativities plotted against rules-of-mixtures semi-empirical parameters number of valence  $d$  electrons ( $d$ -valence), atomic number *per* atom ratio ( $Z/a$ ), and valence electron concentration (VEC).

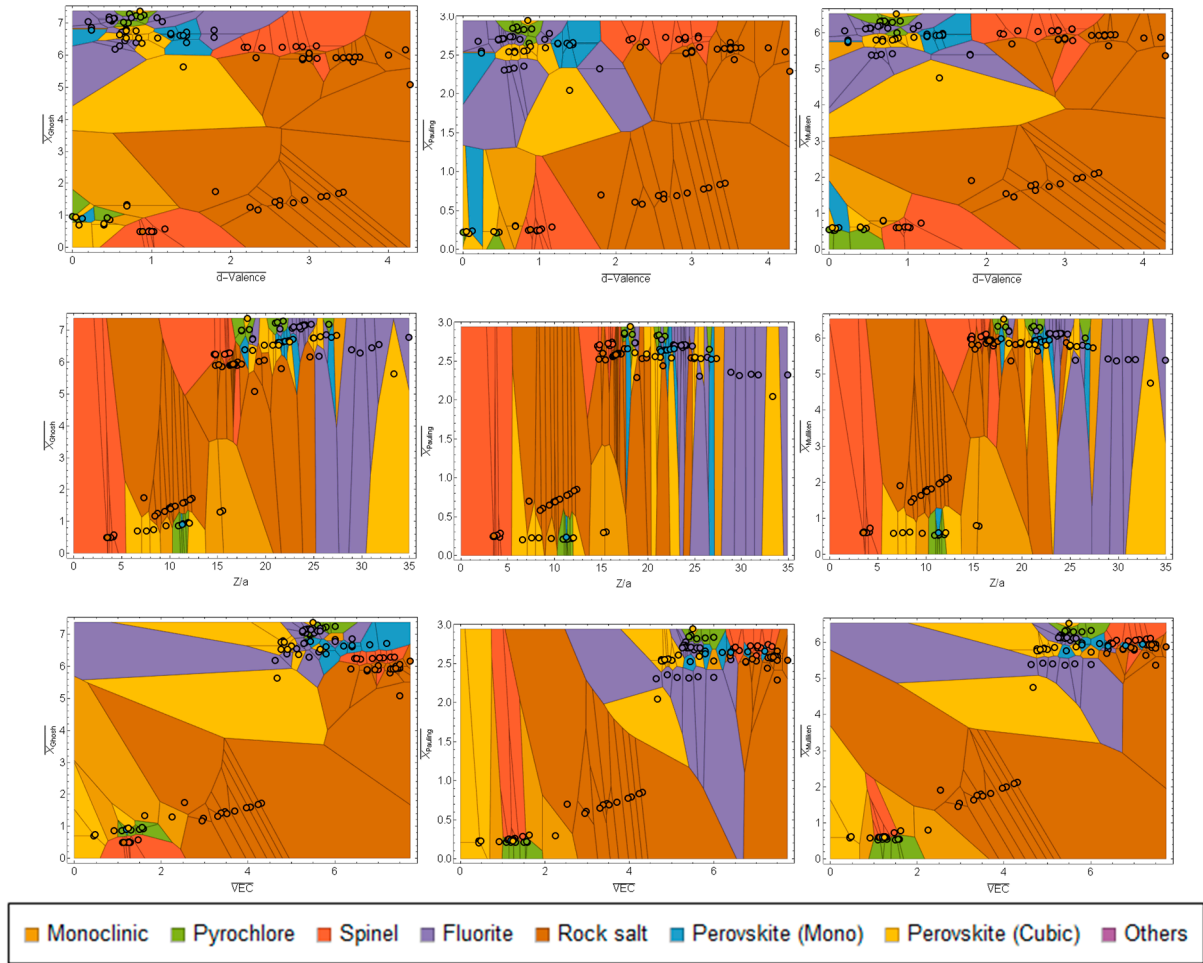

**Figure S2.** Biplots and Voronoi Tessellations for  $3^2$  biplots of rules-of-mixtures Ghosh, Pauling, and Mulliken electronegativities plotted against rules-of-mixtures semi-empirical parameters number of valence  $d$  electrons ( $d$ -valence), atomic number *per* atom ratio ( $Z/a$ ), and valence electron concentration (VEC).

## Supplementary Material B: Predictions of Unknown Compositions

For any known composition of *e.g.*  $((AB)_x(CD)_{1-x})O_2$  the stable phase may be predicted against the biplots shown in the manuscript by determine the atomic-number-per-atom ( $Z/a$ ) and Ghosh electronegativity ratios using the rule-of-mixtures. The rule-of-mixtures are the molar weighted averages of either values. An example is given for modifications to the composition  $((NiCoMgCuZn)(Ti_x)O_n$  which is reported in the literature to show the spinel structure occurring for the  $x = 1$  and the rock salt structure when  $x = 0$  (*cf.* dataset below). When  $x = 0$ ,  $n = 1$ , and when  $x = 1$ ,  $n = 4$ . Values of  $n$  for  $x = 0.2, 0.4, 0.6$ , and  $0.8$  are obtained through interpolation and thus are 1.37, 1.83, 2.4, and 3.11. The specific molar ratios are shown in Table B1 below.

**Table S1.** Molar ratios of  $((NiCoMgCuZn)(Ti_x)O_n$  values ( $x$ : 0, 0.2, 0.4, 0.6, 0.8, and 1.0)

| <b>x</b>    | <b>Ni</b> | <b>Co</b> | <b>Mg</b> | <b>Cu</b> | <b>Zn</b> | <b>Ti</b> | <b>O</b> |
|-------------|-----------|-----------|-----------|-----------|-----------|-----------|----------|
| <b>0.00</b> | 0.10      | 0.10      | 0.10      | 0.10      | 0.10      | 0.00      | 0.50     |
| <b>0.20</b> | 0.08      | 0.08      | 0.08      | 0.08      | 0.08      | 0.08      | 0.53     |
| <b>0.40</b> | 0.06      | 0.06      | 0.06      | 0.06      | 0.06      | 0.12      | 0.57     |
| <b>0.60</b> | 0.05      | 0.05      | 0.05      | 0.05      | 0.05      | 0.15      | 0.60     |
| <b>0.80</b> | 0.04      | 0.04      | 0.04      | 0.04      | 0.04      | 0.16      | 0.63     |
| <b>1.00</b> | 0.03      | 0.03      | 0.03      | 0.03      | 0.03      | 0.17      | 0.67     |

The rules-of-mixtures  $Z/a$  and  $X_{Ghosh}$  values can thus be calculated and are shown in Table B2 below.

**Table S2.** Rules-of-mixtures calculations of  $((NiCoMgCuZn)(Ti_x)O_n$  values ( $x$ : 0, 0.2, 0.4, 0.6, 0.8, and 1.0) for atomic number per atom ( $Z/a$ ) and Ghosh electronegativity ( $X_{Ghosh}$ )

| <b>x</b> | <b>ROM <math>Z/a</math></b> | <b>ROM <math>X_{Ghosh}</math></b> | <b>Literature</b> | <b>Prediction</b> |
|----------|-----------------------------|-----------------------------------|-------------------|-------------------|
| 0        | 14.32                       | 5.97                              | Rock Salt         | Rock Salt         |
| 0.2      | 13.3                        | 6.1                               |                   | Spinel            |
| 0.4      | 12.5                        | 6.2                               |                   | Spinel            |
| 0.6      | 11.7                        | 6.4                               |                   | Spinel            |
| 0.8      | 10.9                        | 6.5                               |                   | Spinel            |
| 1.0      | 10.1                        | 6.7                               | Spinel            | Spinel            |

The values can be calculations are shown graphically in Figure B1 where the predictions suggest that minor additions of Ti will destabilise the system

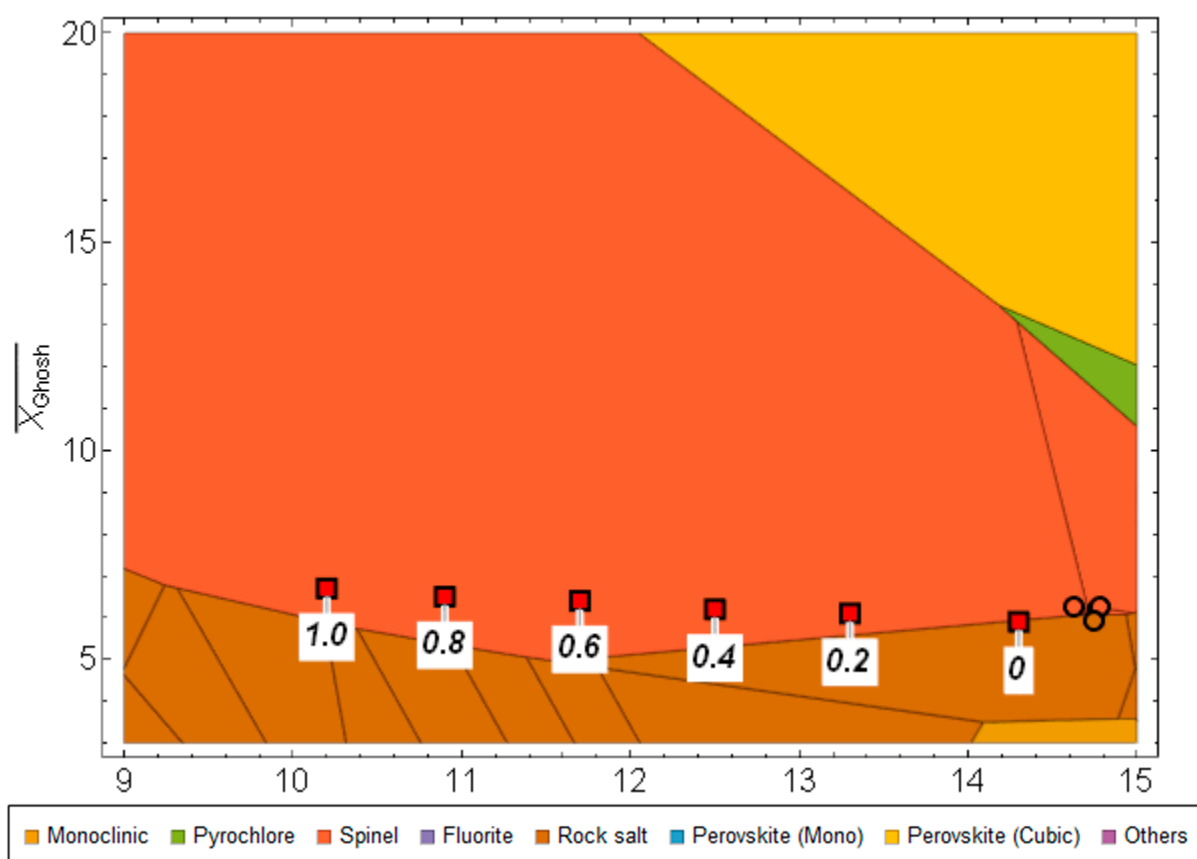

**Figure S3.** Overlay of  $Z/a$ - $X_{Ghosh}$  biplot with phase stable regions obtained through Voronoi tessellation shown.  $((NiCoMgCuZn)(Ti_x)O_n)$  values ( $x$ : 0, 0.2, 0.4, 0.6, 0.8, and 1.0) are overplotted in the figure.

## Supplementary Material c: List of Compositions used for analysis

**Table S3 List of Compositions used for analysis**

| No | Name                                                                                                                                                   | Phase names          | Phase 1                         | Phase 2 | Phase 3 | Category | Reference (DOI)                                                                                                                                                                              |
|----|--------------------------------------------------------------------------------------------------------------------------------------------------------|----------------------|---------------------------------|---------|---------|----------|----------------------------------------------------------------------------------------------------------------------------------------------------------------------------------------------|
| 1  | (NiFeCoCrAl)O                                                                                                                                          | Spinel, BCC, and FCC | Fd-3m                           | Fm-3m   | Im3m    | Mixed    | <a href="https://doi.org/10.1021/acsami.9b08794">10.1021/acsami.9b08794</a>                                                                                                                  |
| 2  | (Sm <sub>0.2</sub> Eu <sub>0.2</sub> Tb <sub>0.2</sub> Dy <sub>0.2</sub> Lu <sub>0.2</sub> ) <sub>2</sub> Zr <sub>2</sub> O <sub>7</sub>               | Pyrochlore           | Fd-3m                           | Fm-3m   |         | Mixed    | <a href="https://doi.org/10.1016/j.scriptamat.2019.12.006">10.1016/j.scriptamat.2019.12.006</a>                                                                                              |
| 3  | Li(NiCoMnAl) <sub>2</sub> O <sub>2</sub>                                                                                                               | Spinel               | Fd-3m                           | Fm-3m   |         | Mixed    | <a href="https://doi.org/10.1038/s41598-020-75134-1">10.1038/s41598-020-75134-1</a>                                                                                                          |
| 4  | (La <sub>0.2</sub> Nd <sub>0.2</sub> Sm <sub>0.2</sub> Gd <sub>0.2</sub> Yb <sub>0.2</sub> ) <sub>2</sub> Zr <sub>2</sub> O <sub>7</sub>               | Pyrochlore           | Fd-3m                           | Fm-3m   |         | Mixed    | <a href="https://doi.org/10.1016/j.jallcom.2019.153328">10.1016/j.jallcom.2019.153328</a>                                                                                                    |
| 5  | (MgZnMnCoNi)O                                                                                                                                          | Rock salt            | Fm-3m                           | Fd-3m   |         | Mixed    | <a href="https://doi.org/10.1021/acscombsci.0c00159">10.1021/acscombsci.0c00159</a>                                                                                                          |
| 6  | (MgNiZnCuCo)O                                                                                                                                          | Rock salt            | Fm-3m                           | Fd-3m   |         | Mixed    | <a href="https://doi.org/10.1021/acs.jpcllett.0c00602">10.1021/acs.jpcllett.0c00602</a><br><a href="https://doi.org/10.1016/j.matchemphys.2020.124014">10.1016/j.matchemphys.2020.124014</a> |
| 7  | (CeGdLaNdPrSmY)O                                                                                                                                       | Fluorite             | Fm-3m                           | Ia-3    |         | Mixed    | <a href="https://doi.org/10.1080/21663831.2016.1220433">10.1080/21663831.2016.1220433</a><br><a href="https://doi.org/10.1039/c7dt02077e">10.1039/c7dt02077e</a>                             |
| 8  | (CeZrYbHoEr)O                                                                                                                                          | Fluorite             | Fm-3m                           | Ia-3    |         | Mixed    | <a href="https://doi.org/10.1016/j.actamat.2020.10.061">10.1016/j.actamat.2020.10.061</a>                                                                                                    |
| 9  | TiHfZrNbTaO <sub>11</sub>                                                                                                                              | Monoclinic           | P <sub>2</sub> /n               | Pbnm    |         | Mixed    | <a href="https://doi.org/10.1039/c9ta12846h">10.1039/c9ta12846h</a>                                                                                                                          |
| 10 | Hf <sub>0.314</sub> Zr <sub>0.314</sub> Ce <sub>0.314</sub> Y <sub>0.029</sub> Yb <sub>0.029</sub> O <sub>2</sub>                                      | Tetragonal, Fluorite | P <sub>42</sub> /nmc            | Fm-3m   |         | Mixed    | <a href="https://doi.org/10.1016/j.jeurceramsoc.2020.01.015">10.1016/j.jeurceramsoc.2020.01.015</a><br><a href="https://doi.org/10.1111/jace.17448">10.1111/jace.17448</a>                   |
| 11 | Hf <sub>0.284</sub> Zr <sub>0.284</sub> Ce <sub>0.284</sub> Y <sub>0.074</sub> Yb <sub>0.074</sub> O <sub>2</sub>                                      | Tetragonal, Fluorite | P <sub>42</sub> /nmc            | Fm-3m   |         | Mixed    | <a href="https://doi.org/10.1016/j.jeurceramsoc.2020.01.015">10.1016/j.jeurceramsoc.2020.01.015</a><br><a href="https://doi.org/10.1111/jace.17448">10.1111/jace.17448</a>                   |
| 12 | (Ca <sub>0.25</sub> Sr <sub>0.25</sub> Ba <sub>0.25</sub> Pb <sub>0.25</sub> )Bi <sub>2</sub> Nb <sub>2</sub> O <sub>9</sub>                           | Aurivillius          | A <sub>21</sub> am              |         |         | Single   | <a href="https://doi.org/10.1016/j.matdes.2020.109447">10.1016/j.matdes.2020.109447</a>                                                                                                      |
| 13 | (Yb <sub>0.25</sub> Y <sub>0.25</sub> Lu <sub>0.25</sub> Er <sub>0.25</sub> ) <sub>2</sub> SiO <sub>5</sub>                                            | Monoclinic           | C <sub>12</sub> /m <sub>1</sub> |         |         | Single   | <a href="https://doi.org/10.1016/j.jmst.2019.07.022">10.1016/j.jmst.2019.07.022</a>                                                                                                          |
| 14 | (Yb <sub>0.2</sub> Y <sub>0.2</sub> Lu <sub>0.2</sub> Sc <sub>0.2</sub> Gd <sub>0.2</sub> ) <sub>2</sub> Si <sub>2</sub> O <sub>7</sub>                | Monoclinic           | C <sub>12</sub> /m <sub>1</sub> |         |         | Single   | <a href="https://doi.org/10.1016/j.jeurceramsoc.2019.02.022">10.1016/j.jeurceramsoc.2019.02.022</a>                                                                                          |
| 15 | (Y <sub>0.25</sub> Ho <sub>0.25</sub> Er <sub>0.25</sub> Yb <sub>0.25</sub> ) <sub>2</sub> SiO <sub>5</sub>                                            | Monoclinic           | C <sub>2</sub> /c               |         |         | Single   | <a href="https://doi.org/10.1016/j.scriptamat.2019.04.018">10.1016/j.scriptamat.2019.04.018</a>                                                                                              |
| 16 | (GdLaNdSmY) <sub>2</sub> O <sub>3</sub>                                                                                                                | Monoclinic           | C <sub>2</sub> /m               |         |         | Single   | <a href="https://doi.org/10.1111/jace.16971">10.1111/jace.16971</a>                                                                                                                          |
| 17 | Nd <sub>2</sub> (Ta <sub>0.2</sub> Sc <sub>0.2</sub> Sn <sub>0.2</sub> Hf <sub>0.2</sub> Zr <sub>0.2</sub> ) <sub>2</sub> O <sub>7</sub>               | Pyrochlore           | Fd-3m                           |         |         | Single   | <a href="https://doi.org/10.1021/jacs.0c10739">10.1021/jacs.0c10739</a>                                                                                                                      |
| 18 | (La <sub>0.2</sub> Nd <sub>0.2</sub> Sm <sub>0.2</sub> Eu <sub>0.2</sub> Gd <sub>0.2</sub> ) <sub>2</sub> Zr <sub>2</sub> O <sub>7</sub>               | Pyrochlore           | Fd-3m                           |         |         | Single   | <a href="https://doi.org/10.1007/s40145-019-0342-4">10.1007/s40145-019-0342-4</a>                                                                                                            |
| 19 | (Gd <sub>0.25</sub> Eu <sub>0.25</sub> Sm <sub>0.25</sub> Nd <sub>0.25</sub> ) <sub>2</sub> Zr <sub>2</sub> O <sub>7</sub>                             | Pyrochlore           | Fd-3m                           |         |         | Single   | <a href="https://doi.org/10.1016/j.jeurceramsoc.2019.12.008">10.1016/j.jeurceramsoc.2019.12.008</a>                                                                                          |
| 20 | Sm <sub>2</sub> (Sn <sub>0.25</sub> Ti <sub>0.25</sub> Hf <sub>0.25</sub> Zr <sub>0.25</sub> ) <sub>2</sub> O <sub>7</sub>                             | Pyrochlore           | Fd-3m                           |         |         | Single   | <a href="https://doi.org/10.1016/j.scriptamat.2020.02.011">10.1016/j.scriptamat.2020.02.011</a>                                                                                              |
| 21 | (La <sub>0.2</sub> Ce <sub>0.2</sub> Nd <sub>0.2</sub> Sm <sub>0.2</sub> Eu <sub>0.2</sub> ) <sub>2</sub> Zr <sub>2</sub> O <sub>7</sub>               | Pyrochlore           | Fd-3m                           |         |         | Single   |                                                                                                                                                                                              |
| 22 | (La <sub>0.2</sub> Ce <sub>0.2</sub> Nd <sub>0.2</sub> Sm <sub>0.2</sub> Eu <sub>0.2</sub> ) <sub>2</sub> Zr <sub>2</sub> O <sub>7</sub>               | Pyrochlore           | Fd-3m                           |         |         | Single   | <a href="https://doi.org/10.1016/j.jmst.2019.05.054">10.1016/j.jmst.2019.05.054</a>                                                                                                          |
| 23 | (La <sub>0.2</sub> Nd <sub>0.2</sub> Sm <sub>0.2</sub> Eu <sub>0.2</sub> Gd <sub>0.2</sub> ) <sub>2</sub> Zr <sub>2</sub> O <sub>7</sub>               | Pyrochlore           | Fd-3m                           |         |         | Single   | <a href="https://doi.org/10.1016/j.jeurceramsoc.2020.01.018">10.1016/j.jeurceramsoc.2020.01.018</a>                                                                                          |
| 24 | (CoMgMnNiZn)(AlCoCrFeMn) <sub>2</sub> O <sub>4</sub>                                                                                                   | Spinel               | Fd-3m                           |         |         | Single   | <a href="https://doi.org/10.1016/j.scriptamat.2020.07.002">10.1016/j.scriptamat.2020.07.002</a>                                                                                              |
| 25 | (Mg <sub>0.2</sub> Co <sub>0.2</sub> Ni <sub>0.2</sub> Cu <sub>0.2</sub> Zn <sub>0.2</sub> )Al <sub>2</sub> O <sub>4</sub>                             | Spinel               | Fd-3m                           |         |         | Single   | <a href="https://doi.org/10.1016/j.scriptamat.2020.04.027">10.1016/j.scriptamat.2020.04.027</a>                                                                                              |
| 26 | (Mg <sub>0.2</sub> Ti <sub>0.2</sub> Zn <sub>0.2</sub> Cu <sub>0.2</sub> Fe <sub>0.2</sub> ) <sub>3</sub> O <sub>4</sub>                               | Spinel               | Fd-3m                           |         |         | Single   | <a href="https://doi.org/10.1039/d0ra00255k">10.1039/d0ra00255k</a>                                                                                                                          |
| 27 | (Co <sub>0.2</sub> Cr <sub>0.2</sub> Fe <sub>0.2</sub> Mn <sub>0.2</sub> Ni <sub>0.2</sub> ) <sub>3</sub> O <sub>4</sub>                               | Spinel               | Fd-3m                           |         |         | Single   | <a href="https://doi.org/10.1016/j.matlet.2017.12.148">10.1016/j.matlet.2017.12.148</a>                                                                                                      |
| 28 | (FeCoNiCrMn) <sub>3</sub> O <sub>4</sub>                                                                                                               | Spinel               | Fd-3m                           |         |         | Single   | <a href="https://doi.org/10.1016/j.jallcom.2020.156158">10.1016/j.jallcom.2020.156158</a>                                                                                                    |
| 29 | (Mg <sub>0.2</sub> Fe <sub>0.2</sub> Co <sub>0.2</sub> Ni <sub>0.2</sub> Cu <sub>0.2</sub> )Fe <sub>2</sub> O <sub>4</sub>                             | Spinel               | Fd-3m                           |         |         | Single   | <a href="https://doi.org/10.1103/PhysRevMaterials.3.104416">10.1103/PhysRevMaterials.3.104416</a>                                                                                            |
| 30 | (Co <sub>0.2</sub> Cu <sub>0.2</sub> Fe <sub>0.2</sub> Mn <sub>0.2</sub> Ni <sub>0.2</sub> ) <sub>3</sub> O <sub>4</sub>                               | Spinel               | Fd-3m                           |         |         | Single   | <a href="https://doi.org/10.1039/c9ta08740k">10.1039/c9ta08740k</a>                                                                                                                          |
| 31 | (Co <sub>0.2</sub> Cr <sub>0.2</sub> Fe <sub>0.2</sub> Mn <sub>0.2</sub> Ni <sub>0.2</sub> ) <sub>3</sub> O <sub>4</sub>                               | Spinel               | Fd-3m                           |         |         | Single   | <a href="https://doi.org/10.1016/j.jmmm.2019.165884">10.1016/j.jmmm.2019.165884</a>                                                                                                          |
| 32 | (Al <sub>0.167</sub> Co <sub>0.167</sub> Cr <sub>0.167</sub> Fe <sub>0.167</sub> Mn <sub>0.167</sub> Ni <sub>0.167</sub> ) <sub>3</sub> O <sub>4</sub> | Spinel               | Fd-3m                           |         |         | Single   | <a href="https://doi.org/10.1016/j.jmmm.2020.166594">10.1016/j.jmmm.2020.166594</a>                                                                                                          |
| 33 | (Zn <sub>0.2</sub> Fe <sub>0.2</sub> Ni <sub>0.2</sub> Mg <sub>0.2</sub> Cd <sub>0.2</sub> )Fe <sub>2</sub> O <sub>4</sub>                             | Spinel               | Fd-3m                           |         |         | Single   | <a href="https://doi.org/10.1038/s41598-019-56586-6">10.1038/s41598-019-56586-6</a>                                                                                                          |
| 34 | (NiCoCrFeMn)O                                                                                                                                          | Spinel               | Fd-3m                           |         |         | Single   | <a href="https://doi.org/10.1021/acsami.0c11899">10.1021/acsami.0c11899</a>                                                                                                                  |

|    |                                                                                                                                   |           |       |  |  |        |                                                                                                                                             |
|----|-----------------------------------------------------------------------------------------------------------------------------------|-----------|-------|--|--|--------|---------------------------------------------------------------------------------------------------------------------------------------------|
| 35 | (Hf <sub>0.25</sub> Zr <sub>0.25</sub> Ce <sub>0.25</sub> Y <sub>0.25</sub> )O <sub>2</sub>                                       | Fluorite  | Fm-3m |  |  | Single | <a href="#">10.1016/j.jeurceramsoc.2018.04.010</a>                                                                                          |
| 36 | (Ce <sub>0.2</sub> Zr <sub>0.2</sub> Hf <sub>0.2</sub> Sn <sub>0.2</sub> Ti <sub>0.2</sub> )O <sub>2</sub>                        | Fluorite  | Fm-3m |  |  | Single | <a href="#">10.1016/j.jeurceramsoc.2018.04.063</a>                                                                                          |
| 37 | (Ce <sub>0.2</sub> La <sub>0.2</sub> Pr <sub>0.2</sub> Sm <sub>0.2</sub> Y <sub>0.2</sub> )O <sub>2</sub>                         | Fluorite  | Fm-3m |  |  | Single | <a href="#">10.1016/j.scriptamat.2019.02.039</a>                                                                                            |
| 38 | (Gd <sub>0.2</sub> La <sub>0.2</sub> Y <sub>0.2</sub> Hf <sub>0.2</sub> Zr <sub>0.2</sub> )O <sub>2</sub>                         | Fluorite  | Fm-3m |  |  | Single | <a href="#">10.1039/c9ra04636d</a>                                                                                                          |
| 39 | Gd <sub>0.2</sub> La <sub>0.2</sub> Ce <sub>0.2</sub> Hf <sub>0.2</sub> Zr <sub>0.2</sub> O <sub>2</sub>                          | Fluorite  | Fm-3m |  |  | Single | <a href="#">10.1016/j.jallcom.2020.156716</a>                                                                                               |
| 40 | Gd <sub>0.2</sub> La <sub>0.2</sub> Y <sub>0.2</sub> Hf <sub>0.2</sub> Zr <sub>0.2</sub> O <sub>2</sub>                           | Fluorite  | Fm-3m |  |  | Single | <a href="#">10.1016/j.jallcom.2020.156716</a>                                                                                               |
| 41 | (Sc <sub>0.2</sub> Ce <sub>0.2</sub> Pr <sub>0.2</sub> Gd <sub>0.2</sub> Ho <sub>0.2</sub> ) <sub>2</sub> O <sub>3</sub>          | Fluorite  | Fm-3m |  |  | Single | <a href="#">10.1088/1757-899X/597/1/012005</a>                                                                                              |
| 42 | (CeZrYLaGd)O                                                                                                                      | Fluorite  | Fm-3m |  |  | Single | <a href="#">10.3390/ma13030558</a>                                                                                                          |
| 43 | (CeZrHfTiLa)O                                                                                                                     | Fluorite  | Fm-3m |  |  | Single | <a href="#">10.1038/s41467-020-17738-9</a>                                                                                                  |
| 44 | (Mg <sub>0.2</sub> Co <sub>0.2</sub> Cu <sub>0.2</sub> Ni <sub>0.2</sub> Zn <sub>0.2</sub> )O                                     | Rock salt | Fm-3m |  |  | Single | <a href="#">10.1021/acsami.0c13161</a><br><a href="#">10.1039/D0CC05860B</a>                                                                |
| 45 | (Mg <sub>0.2</sub> Co <sub>0.2</sub> Cu <sub>0.2</sub> Ni <sub>0.2</sub> Zn <sub>0.2</sub> )O                                     | Rock salt | Fm-3m |  |  | Single | <a href="#">10.1080/21663831.2018.1554605</a>                                                                                               |
| 46 | (Mg <sub>0.2</sub> Co <sub>0.2</sub> Ni <sub>0.2</sub> Cu <sub>0.2</sub> Zn <sub>0.2</sub> )O                                     | Rock salt | Fm-3m |  |  | Single | <a href="#">10.1039/c9ra05508h</a>                                                                                                          |
| 47 | (MgCoNiZn) <sub>0.84</sub> Cu <sub>0.16</sub> O                                                                                   | Rock salt | Fm-3m |  |  | Single | <a href="#">10.1016/j.matdes.2021.109534</a>                                                                                                |
| 48 | (MgCoNiZn) <sub>0.82</sub> Cu <sub>0.18</sub> O                                                                                   | Rock salt | Fm-3m |  |  | Single | <a href="#">10.1016/j.matdes.2021.109534</a>                                                                                                |
| 49 | (MgCoNiZn) <sub>0.72</sub> Cu <sub>0.28</sub> O                                                                                   | Rock salt | Fm-3m |  |  | Single | <a href="#">10.1016/j.matdes.2021.109534</a>                                                                                                |
| 50 | (Mg <sub>0.2</sub> Co <sub>0.2</sub> Cu <sub>0.2</sub> Ni <sub>0.2</sub> Zn <sub>0.2</sub> ) <sub>0.98</sub> Li <sub>0.02</sub> O | Rock salt | Fm-3m |  |  | Single | <a href="#">10.1039/c6ta03249d</a><br><a href="#">10.1021/acsami.0c03562</a>                                                                |
| 51 | (Mg <sub>0.2</sub> Co <sub>0.2</sub> Cu <sub>0.2</sub> Ni <sub>0.2</sub> Zn <sub>0.2</sub> ) <sub>0.92</sub> Li <sub>0.08</sub> O | Rock salt | Fm-3m |  |  | Single | <a href="#">10.1039/c6ta03249d</a>                                                                                                          |
| 52 | (Mg <sub>0.2</sub> Co <sub>0.2</sub> Cu <sub>0.2</sub> Ni <sub>0.2</sub> Zn <sub>0.2</sub> ) <sub>0.9</sub> Li <sub>0.10</sub> O  | Rock salt | Fm-3m |  |  | Single | <a href="#">10.1039/c6ta03249d</a>                                                                                                          |
| 53 | (Mg <sub>0.2</sub> Co <sub>0.2</sub> Cu <sub>0.2</sub> Ni <sub>0.2</sub> Zn <sub>0.2</sub> ) <sub>0.84</sub> Li <sub>0.16</sub> O | Rock salt | Fm-3m |  |  | Single | <a href="#">10.1039/c6ta03249d</a>                                                                                                          |
| 54 | (Mg <sub>0.2</sub> Co <sub>0.2</sub> Cu <sub>0.2</sub> Ni <sub>0.2</sub> Zn <sub>0.2</sub> ) <sub>0.8</sub> Li <sub>0.20</sub> O  | Rock salt | Fm-3m |  |  | Single | <a href="#">10.1039/c6ta03249d</a>                                                                                                          |
| 55 | (Mg <sub>0.2</sub> Co <sub>0.2</sub> Cu <sub>0.2</sub> Ni <sub>0.2</sub> Zn <sub>0.2</sub> ) <sub>0.75</sub> Li <sub>0.25</sub> O | Rock salt | Fm-3m |  |  | Single | <a href="#">10.1039/c6ta03249d</a>                                                                                                          |
| 56 | (Mg <sub>0.2</sub> Co <sub>0.2</sub> Cu <sub>0.2</sub> Ni <sub>0.2</sub> Zn <sub>0.2</sub> ) <sub>0.67</sub> Li <sub>0.33</sub> O | Rock salt | Fm-3m |  |  | Single | <a href="#">10.1039/c6ta03249d</a>                                                                                                          |
| 57 | (Co <sub>0.2</sub> Ni <sub>0.2</sub> Cu <sub>0.2</sub> Zn <sub>0.2</sub> Li <sub>0.1</sub> Ga <sub>0.1</sub> )O                   | Rock salt | Fm-3m |  |  | Single | <a href="#">10.1063/1.5091787</a>                                                                                                           |
| 58 | CuCeO(NiMgCuZnCo)O                                                                                                                | Rock salt | Fm-3m |  |  | Single | <a href="#">10.1016/j.apcatb.2020.119155</a>                                                                                                |
| 59 | (CeNiMgCuZnCo)O                                                                                                                   | Rock salt | Fm-3m |  |  | Single | <a href="#">10.1016/j.apcatb.2020.119155</a>                                                                                                |
| 60 | Li <sub>0.94</sub> (Co <sub>0.2</sub> Cu <sub>0.2</sub> Mg <sub>0.2</sub> Ni <sub>0.2</sub> Zn <sub>0.2</sub> )OF <sub>0.87</sub> | Rock salt | Fm-3m |  |  | Single | <a href="#">10.1039/c9ee00368a</a>                                                                                                          |
| 61 | (MgCoCuNiZn) <sub>0.95</sub> Li <sub>0.05</sub> O <sub>0.975</sub>                                                                | Rock salt | Fm-3m |  |  | Single | <a href="#">10.1021/acs.jpcc.9b04992</a>                                                                                                    |
| 62 | (Co <sub>0.2</sub> Cu <sub>0.2</sub> Mg <sub>0.2</sub> Ni <sub>0.2</sub> Zn <sub>0.2</sub> )O                                     | Rock salt | Fm-3m |  |  | Single | <a href="#">10.1038/s41467-018-05774-5</a><br><a href="#">10.1016/j.elecom.2019.02.001</a><br><a href="#">10.1016/j.actamat.2020.09.034</a> |
| 63 | (Co <sub>0.2</sub> Cu <sub>0.2</sub> Mg <sub>0.2</sub> Ni <sub>0.2</sub> Zn <sub>0.2</sub> )O                                     | Rock salt | Fm-3m |  |  | Single | <a href="#">10.1016/j.actamat.2020.09.034</a>                                                                                               |
| 64 | (Co <sub>0.2</sub> Cu <sub>0.2</sub> Mg <sub>0.2</sub> Ni <sub>0.2</sub> Zn <sub>0.2</sub> )O                                     | Rock salt | Fm-3m |  |  | Single | <a href="#">10.1016/j.actamat.2020.09.034</a>                                                                                               |
| 65 | (CoCuMgNaNiZn)O                                                                                                                   | Rock salt | Fm-3m |  |  | Single | <a href="#">10.1039/D0DT00958J</a>                                                                                                          |
| 66 | Pt <sub>0.3</sub> Mg <sub>0.2</sub> Co <sub>0.2</sub> Cu <sub>0.2</sub> Ni <sub>0.2</sub> Zn <sub>0.2</sub> O                     | Rock salt | Fm-3m |  |  | Single | <a href="#">10.1039/c8ta01772g</a>                                                                                                          |
| 67 | (Mg <sub>0.2</sub> Co <sub>0.2</sub> Ni <sub>0.2</sub> Cu <sub>0.2</sub> Zn <sub>0.2</sub> )O                                     | Rock salt | Fm-3m |  |  | Single | <a href="#">10.1007/s10853-018-2168-9</a>                                                                                                   |
| 68 | (Mg <sub>0.2</sub> Co <sub>0.2</sub> Ni <sub>0.2</sub> Cu <sub>0.2</sub> Zn <sub>0.2</sub> )O                                     | Rock salt | Fm-3m |  |  | Single | <a href="#">10.1021/acs.materialslett.9b00064</a>                                                                                           |
| 69 | (CuNiFeCoMg)OAl <sub>2</sub> O <sub>3</sub>                                                                                       | Rock salt | Fm-3m |  |  | Single | <a href="#">10.1021/acs.chemmater.9b01244</a>                                                                                               |
| 70 | (Mg <sub>0.167</sub> Co <sub>0.167</sub> Cu <sub>0.167</sub> Ni <sub>0.167</sub> Zn <sub>0.167</sub> Sc <sub>0.167</sub> )O       | Rock salt | Fm-3m |  |  | Single | <a href="#">10.1063/1.4962135</a>                                                                                                           |
| 71 | (Mg <sub>0.167</sub> Co <sub>0.167</sub> Cu <sub>0.167</sub> Ni <sub>0.167</sub> Zn <sub>0.167</sub> Li <sub>0.167</sub> )O       | Rock salt | Fm-3m |  |  | Single | <a href="#">10.1063/1.4962135</a>                                                                                                           |
| 72 | (Mg <sub>0.25</sub> Co <sub>0.25</sub> Ni <sub>0.25</sub> Zn <sub>0.25</sub> )O                                                   | Rock salt | Fm-3m |  |  | Single | <a href="#">10.1038/s41598-017-13810-5</a>                                                                                                  |
| 73 | (Mg <sub>0.2</sub> Co <sub>0.2</sub> Cu <sub>0.2</sub> Ni <sub>0.2</sub> Zn <sub>0.2</sub> )O                                     | Rock salt | Fm-3m |  |  | Single | <a href="#">10.1038/s41598-017-13810-5</a>                                                                                                  |
| 74 | (Mg <sub>0.1825</sub> Co <sub>0.27</sub> Cu <sub>0.1825</sub> Ni <sub>0.1825</sub> Zn <sub>0.1825</sub> )O                        | Rock salt | Fm-3m |  |  | Single | <a href="#">10.1038/s41598-017-13810-5</a>                                                                                                  |

|     |                                                                                                                                                                        |                 |                      |  |  |        |                                                                                                     |
|-----|------------------------------------------------------------------------------------------------------------------------------------------------------------------------|-----------------|----------------------|--|--|--------|-----------------------------------------------------------------------------------------------------|
| 75  | (Mg <sub>0.1675</sub> Co <sub>0.33</sub> Cu <sub>0.1675</sub> Ni <sub>0.1675</sub> Zn <sub>0.1675</sub> )O                                                             | Rock salt       | Fm-3m                |  |  | Single | <a href="https://doi.org/10.1038/s41598-017-13810-5">10.1038/s41598-017-13810-5</a>                 |
| 76  | (Al <sub>0.31</sub> Cr <sub>0.20</sub> Fe <sub>0.14</sub> Ni <sub>0.35</sub> )O                                                                                        | Rock salt       | Fm-3m                |  |  | Single | <a href="https://doi.org/10.1088/1674-1056/28/4/046201">10.1088/1674-1056/28/4/046201</a>           |
| 77  | (Mg <sub>0.18</sub> Co <sub>0.27</sub> Ni <sub>0.18</sub> Cu <sub>0.18</sub> Zn <sub>0.18</sub> )O                                                                     | Rock salt       | Fm-3m                |  |  | Single | 10.1103/PhysRevMaterials.3.104421                                                                   |
| 78  | (Mg <sub>0.17</sub> Co <sub>0.33</sub> Ni <sub>0.17</sub> Cu <sub>0.17</sub> Zn <sub>0.17</sub> )O                                                                     | Rock salt       | Fm-3m                |  |  | Single | 10.1103/PhysRevMaterials.3.104421                                                                   |
| 79  | (Mg <sub>0.22</sub> Co <sub>0.22</sub> Ni <sub>0.22</sub> Cu <sub>0.11</sub> Zn <sub>0.22</sub> )O                                                                     | Rock salt       | Fm-3m                |  |  | Single | 10.1103/PhysRevMaterials.3.104421                                                                   |
| 80  | (Mg <sub>0.21</sub> Co <sub>0.21</sub> Ni <sub>0.21</sub> Cu <sub>0.16</sub> Zn <sub>0.21</sub> )O                                                                     | Rock salt       | Fm-3m                |  |  | Single | 10.1103/PhysRevMaterials.3.104421                                                                   |
| 81  | (Mg <sub>0.2</sub> Co <sub>0.2</sub> Ni <sub>0.2</sub> Cu <sub>0.2</sub> Zn <sub>0.2</sub> )O                                                                          | Rock salt       | Fm-3m                |  |  | Single | 10.1103/PhysRevMaterials.3.104421                                                                   |
| 82  | (Mg <sub>0.18</sub> Co <sub>0.18</sub> Ni <sub>0.18</sub> Cu <sub>0.27</sub> Zn <sub>0.18</sub> )O                                                                     | Rock salt       | Fm-3m                |  |  | Single | 10.1103/PhysRevMaterials.3.104421                                                                   |
| 83  | (Mg <sub>0.19</sub> Co <sub>0.19</sub> Ni <sub>0.19</sub> Cu <sub>0.24</sub> Zn <sub>0.19</sub> )O                                                                     | Rock salt       | Fm-3m                |  |  | Single | 10.1103/PhysRevMaterials.3.104421                                                                   |
| 84  | (CoCuMgNiZnGd)O                                                                                                                                                        | Rock salt       | Fm-3m                |  |  | Single | <a href="https://doi.org/10.1016/j.matlet.2020.129175">10.1016/j.matlet.2020.129175</a>             |
| 85  | (Mg <sub>0.2</sub> Co <sub>0.2</sub> Cu <sub>0.2</sub> Ni <sub>0.2</sub> Zn <sub>0.2</sub> )O                                                                          | Rock salt       | Fm-3m                |  |  | Single | <a href="https://doi.org/10.1016/j.jeurceramsoc.2020.01.018">10.1016/j.jeurceramsoc.2020.01.018</a> |
| 86  | (CeGdLaPrY) <sub>2</sub> O <sub>3</sub>                                                                                                                                | Bixbyite        | Ia-3                 |  |  | Single | <a href="https://doi.org/10.1111/jace.16971">10.1111/jace.16971</a>                                 |
| 87  | (Gd <sub>0.4</sub> Tb <sub>0.4</sub> Dy <sub>0.4</sub> Ho <sub>0.4</sub> Er <sub>0.4</sub> O <sub>3</sub>                                                              | Cubic Bixbyite  | Ia-3                 |  |  | Single | <a href="https://doi.org/10.1111/jace.16689">10.1111/jace.16689</a>                                 |
| 88  | (Lu <sub>0.167</sub> Y <sub>0.167</sub> Ho <sub>0.167</sub> Dy <sub>0.167</sub> Tb <sub>0.167</sub> Gd <sub>0.167</sub> ) <sub>3</sub> Al <sub>5</sub> O <sub>12</sub> | Garnet          | Ia-3d                |  |  | Single | <a href="https://doi.org/10.1021/acs.cgd.0c00887">10.1021/acs.cgd.0c00887</a>                       |
| 89  | (Al <sub>0.19</sub> Cr <sub>0.13</sub> Nb <sub>0.19</sub> Ta <sub>0.30</sub> Ti <sub>0.19</sub> )O <sub>2</sub>                                                        | Rutile          | P <sub>42</sub> /mnm |  |  | Single | <a href="https://doi.org/10.1016/j.vacuum.2019.108850">10.1016/j.vacuum.2019.108850</a>             |
| 90  | (Ba <sub>0.7</sub> Sr <sub>0.3</sub> )(Fe <sub>2.9</sub> Al <sub>2.5</sub> Mn <sub>3</sub> Ti <sub>1</sub> Ni <sub>2.9</sub> )O <sub>19</sub>                          | Magnetoplumbite | P <sub>63</sub> /mmc |  |  | Single | <a href="https://doi.org/10.1016/j.ceramint.2019.03.221">10.1016/j.ceramint.2019.03.221</a>         |
| 91  | (Ce <sub>0.2</sub> La <sub>0.2</sub> Pr <sub>0.2</sub> Sm <sub>0.2</sub> Y <sub>0.2</sub> )O <sub>3</sub>                                                              | Perovskite      | Pbmn                 |  |  | Single | <a href="https://doi.org/10.1016/j.scriptamat.2019.02.039">10.1016/j.scriptamat.2019.02.039</a>     |
| 92  | (Gd <sub>0.2</sub> Nd <sub>0.2</sub> La <sub>0.2</sub> Sm <sub>0.2</sub> Y <sub>0.2</sub> )CoO <sub>3</sub>                                                            | Perovskite      | Pbmn                 |  |  | Single | <a href="https://doi.org/10.1021/acsaelm.0c00559">10.1021/acsaelm.0c00559</a>                       |
| 93  | La(Cr <sub>0.2</sub> Mn <sub>0.2</sub> Fe <sub>0.2</sub> Co <sub>0.2</sub> Ni <sub>0.2</sub> )O <sub>3</sub>                                                           | Perovskite      | Pbnm                 |  |  | Single | <a href="https://doi.org/10.1103/PhysRevMaterials.4.014404">10.1103/PhysRevMaterials.4.014404</a>   |
| 94  | (Gd <sub>0.2</sub> La <sub>0.2</sub> Nd <sub>0.2</sub> Sm <sub>0.2</sub> Y <sub>0.2</sub> )MnO <sub>3</sub>                                                            | Perovskite      | Pbnm                 |  |  | Single | <a href="https://doi.org/10.1063/5.0004125">10.1063/5.0004125</a>                                   |
| 95  | Y(Co <sub>0.2</sub> Cr <sub>0.2</sub> Fe <sub>0.2</sub> Mn <sub>0.2</sub> Ni <sub>0.2</sub> )O <sub>3</sub>                                                            | Perovskite      | Pbnm                 |  |  | Single | <a href="https://doi.org/10.1063/5.0004125">10.1063/5.0004125</a>                                   |
| 96  | (Bi <sub>0.2</sub> Na <sub>0.2</sub> K <sub>0.2</sub> Ba <sub>0.2</sub> Ca <sub>0.2</sub> )TiO <sub>3</sub>                                                            | Perovskite      | Pm-3m                |  |  | Single | <a href="https://doi.org/10.1016/j.ceramint.2020.05.090">10.1016/j.ceramint.2020.05.090</a>         |
| 97  | Sr(Ti <sub>0.2</sub> Y <sub>0.2</sub> Zr <sub>0.2</sub> Sn <sub>0.2</sub> Hf <sub>0.2</sub> )O <sub>3</sub>                                                            | Perovskite      | Pm-3m                |  |  | Single | <a href="https://doi.org/10.1016/j.ceramint.2020.04.060">10.1016/j.ceramint.2020.04.060</a>         |
| 98  | Ba(Mg <sub>0.2</sub> Zn <sub>0.2</sub> Ti <sub>0.2</sub> W <sub>0.2</sub> Mo <sub>0.2</sub> )O                                                                         | Perovskite      | Pm-3m                |  |  | Single | <a href="https://doi.org/10.2139/ssrn.3656143">10.2139/ssrn.3656143</a>                             |
| 99  | Sr(Ti <sub>0.2</sub> Fe <sub>0.2</sub> Mo <sub>0.2</sub> Nb <sub>0.2</sub> Cr <sub>0.2</sub> )O <sub>3</sub>                                                           | Perovskite      | Pm-3m                |  |  | Single | <a href="https://doi.org/10.1021/acssuschemeng.0c03849">10.1021/acssuschemeng.0c03849</a>           |
| 100 | (Na <sub>0.2</sub> K <sub>0.2</sub> Ca <sub>0.2</sub> La <sub>0.2</sub> Ce <sub>0.2</sub> )TiO <sub>3</sub>                                                            | Perovskite      | Pm-3m                |  |  | Single | <a href="https://doi.org/10.3390/nano10020268">10.3390/nano10020268</a>                             |
| 101 | Sr(Zr <sub>0.2</sub> Sn <sub>0.2</sub> Ti <sub>0.2</sub> Hf <sub>0.2</sub> Mn <sub>0.2</sub> )O <sub>3</sub>                                                           | Perovskite      | Pm-3m                |  |  | Single | <a href="https://doi.org/10.1016/j.scriptamat.2017.08.040">10.1016/j.scriptamat.2017.08.040</a>     |
| 102 | Ba(Zr <sub>0.2</sub> Sn <sub>0.2</sub> Ti <sub>0.2</sub> Hf <sub>0.2</sub> Ce <sub>0.2</sub> )O <sub>3</sub>                                                           | Perovskite      | Pm-3m                |  |  | Single | <a href="https://doi.org/10.1016/j.scriptamat.2017.08.040">10.1016/j.scriptamat.2017.08.040</a>     |
| 103 | Ba(Zr <sub>0.2</sub> Ti <sub>0.2</sub> Sn <sub>0.2</sub> Hf <sub>0.2</sub> Y <sub>0.2</sub> )O <sub>3</sub>                                                            | Perovskite      | Pm-3m                |  |  | Single | <a href="https://doi.org/10.1016/j.ceramint.2019.11.239">10.1016/j.ceramint.2019.11.239</a>         |
| 104 | (Na <sub>0.2</sub> Bi <sub>0.2</sub> Ba <sub>0.2</sub> Sr <sub>0.2</sub> Ca <sub>0.2</sub> )TiO <sub>3</sub>                                                           | Perovskite      | Pm-3m                |  |  | Single | <a href="https://doi.org/10.1063/1.5126652">10.1063/1.5126652</a>                                   |
| 105 | Ba <sub>0.5</sub> Sr <sub>0.5</sub> (Zr <sub>0.4</sub> Hf <sub>0.3</sub> Ti <sub>0.2</sub> Fe <sub>0.3</sub> )O <sub>3</sub>                                           | Perovskite      | Pm-3m                |  |  | Single | <a href="https://doi.org/10.1002/cssc.201902705">10.1002/cssc.201902705</a>                         |
| 106 | Sr(Zr <sub>0.188</sub> Y <sub>0.012</sub> Sn <sub>0.2</sub> Ti <sub>0.2</sub> Hf <sub>0.2</sub> Mn <sub>0.2</sub> )O <sub>3</sub>                                      | Perovskite      | Pm-3m                |  |  | Single | <a href="https://doi.org/10.1080/21870764.2019.1595931">10.1080/21870764.2019.1595931</a>           |
| 107 | Ba(Zr <sub>0.2</sub> Sn <sub>0.2</sub> Ti <sub>0.2</sub> Hf <sub>0.2</sub> Nb <sub>0.2</sub> )O <sub>3</sub>                                                           | Perovskite      | Pm-3m                |  |  | Single | <a href="https://doi.org/10.1103/PhysRevMaterials.2.060404">10.1103/PhysRevMaterials.2.060404</a>   |
| 108 | (La <sub>0.2</sub> Pr <sub>0.2</sub> Nd <sub>0.2</sub> Sm <sub>0.2</sub> Eu <sub>0.2</sub> )NiO <sub>3</sub>                                                           | Perovskite      | Pm-3m                |  |  | Single | <a href="https://doi.org/10.1063/1.5133710">10.1063/1.5133710</a>                                   |
| 109 | La <sub>0.4</sub> Pr <sub>0.3</sub> Ca <sub>0.1</sub> Sr <sub>0.2</sub> MnO <sub>3</sub>                                                                               | Perovskite      | Pm-3m                |  |  | Single | <a href="https://doi.org/10.1038/s41598-020-76321-w">10.1038/s41598-020-76321-w</a>                 |
| 110 | Zr <sub>0.2</sub> Sn <sub>0.2</sub> Ti <sub>0.2</sub> Hf <sub>0.2</sub> Ce <sub>0.2</sub> O <sub>3</sub>                                                               | Perovskite      | Pm-3m                |  |  | Single | <a href="https://doi.org/10.1021/acsmaterialslett.0c00257">10.1021/acsmaterialslett.0c00257</a>     |
| 111 | Y(Co <sub>0.2</sub> Cr <sub>0.2</sub> Fe <sub>0.2</sub> Mn <sub>0.2</sub> Ni <sub>0.2</sub> )O <sub>3</sub>                                                            | Perovskite      | Pbnm                 |  |  | Single | <a href="https://doi.org/10.1103/PhysRevMaterials.3.034406">10.1103/PhysRevMaterials.3.034406</a>   |
| 112 | (GdEuSmNdLaDyHo) <sub>2</sub> Zr <sub>2</sub> O <sub>7</sub>                                                                                                           | Pyrochlore      | Fd-3m                |  |  | Single | <a href="https://doi.org/10.1016/j.jmst.2020.12.025">10.1016/j.jmst.2020.12.025</a>                 |
| 113 | (SmEuTbDyLu) <sub>2</sub> Zr <sub>2</sub> O <sub>7</sub>                                                                                                               | Pyrochlore      | Fd-3m                |  |  | Single | <a href="https://doi.org/10.1016/j.jmst.2020.12.025">10.1016/j.jmst.2020.12.025</a>                 |
| 114 | (LaNdSmGdYb) <sub>2</sub> Zr <sub>2</sub> O <sub>7</sub>                                                                                                               | Pyrochlore      | Fd-3m                |  |  | Single | <a href="https://doi.org/10.1016/j.jmst.2020.12.025">10.1016/j.jmst.2020.12.025</a>                 |
| 115 | Sm <sub>2</sub> (TiZrHfSn) <sub>2</sub> O <sub>7</sub>                                                                                                                 | Pyrochlore      | Fd-3m                |  |  | Single | <a href="https://doi.org/10.1016/j.jmst.2020.12.025">10.1016/j.jmst.2020.12.025</a>                 |
| 116 | Gd <sub>2</sub> (TiZrHfSn) <sub>2</sub> O <sub>7</sub>                                                                                                                 | Pyrochlore      | Fd-3m                |  |  | Single | <a href="https://doi.org/10.1016/j.jmst.2020.12.025">10.1016/j.jmst.2020.12.025</a>                 |
| 117 | (LaCeNdSmEu) <sub>2</sub> Zr <sub>2</sub> O <sub>7</sub>                                                                                                               | Pyrochlore      | Fd-3m                |  |  | Single | <a href="https://doi.org/10.1016/j.jmst.2020.12.025">10.1016/j.jmst.2020.12.025</a>                 |

|     |                                                                                                                   |                          |       |  |  |        |                                                                                                                 |
|-----|-------------------------------------------------------------------------------------------------------------------|--------------------------|-------|--|--|--------|-----------------------------------------------------------------------------------------------------------------|
| 118 | (YbErLu) <sub>2</sub> (ZrHf) <sub>2</sub> O <sub>7</sub>                                                          | Pyrochlore               | Fd-3m |  |  | Single | <a href="https://doi.org/10.1016/j.jmst.2020.12.025">10.1016/j.jmst.2020.12.025</a>                             |
| 119 | Y <sub>2</sub> (TiZrHfMoV) <sub>2</sub> O <sub>7</sub>                                                            | Pyrochlore               | Fd-3m |  |  | Single | <a href="https://doi.org/10.1016/j.jmst.2020.12.025">10.1016/j.jmst.2020.12.025</a>                             |
| 120 | Y <sub>2</sub> (TiHfMoV) <sub>2</sub> O <sub>7</sub>                                                              | Pyrochlore               | Fd-3m |  |  | Single | <a href="https://doi.org/10.1016/j.jmst.2020.12.025">10.1016/j.jmst.2020.12.025</a>                             |
| 121 | Y <sub>2</sub> (TiZrHfMo) <sub>2</sub> O <sub>7</sub>                                                             | Pyrochlore               | Fd-3m |  |  | Single | <a href="https://doi.org/10.1016/j.jmst.2020.12.025">10.1016/j.jmst.2020.12.025</a>                             |
| 122 | (CoMgMnNiZn)(AlCoCrFeMn) <sub>2</sub> O <sub>4</sub>                                                              | Spinel                   | Fd-3m |  |  | Single | [70]                                                                                                            |
| 123 | (CrFeMnCoZn) <sub>3</sub> O <sub>4</sub>                                                                          | Spinel                   | Fd-3m |  |  | Single | <a href="https://doi.org/10.1016/j.immm.2019.165884">10.1016/j.immm.2019.165884</a>                             |
| 124 | (CrFeMnNiZn) <sub>3</sub> O <sub>4</sub>                                                                          | Spinel                   | Fd-3m |  |  | Single | <a href="https://doi.org/10.1016/j.immm.2019.165884">10.1016/j.immm.2019.165884</a>                             |
| 125 | (AlCoCrFeMnNi) <sub>3</sub> O <sub>4</sub>                                                                        | Spinel                   | Fd-3m |  |  | Single | <a href="https://doi.org/10.1016/j.immm.2020.166594">10.1016/j.immm.2020.166594</a>                             |
| 126 | (CrMnFeNiCu) <sub>3</sub> O <sub>4</sub>                                                                          | Spinel                   | Fd-3m |  |  | Single | <a href="https://doi.org/10.1016/j.cej.2021.132658">10.1016/j.cej.2021.132658</a>                               |
| 127 | (MgCoNiCuZn)Cr <sub>2</sub> O <sub>4</sub>                                                                        | Spinel                   | Fd-3m |  |  | Single | <a href="https://doi.org/10.1016/j.scriptamat.2020.03.033">https://doi.org/10.1016/j.scriptamat.2020.03.033</a> |
| 128 | (CoCuMgNiZn)TiO <sub>4</sub>                                                                                      | Spinel                   | Fd-3m |  |  | Single | <a href="https://doi.org/10.1016/j.jallcom.2021.161390">10.1016/j.jallcom.2021.161390</a>                       |
| 129 | (MgFeCoNiCu)Cr <sub>2</sub> O <sub>4</sub>                                                                        | Spinel                   | Fd-3m |  |  | Single | <a href="https://doi.org/10.1103/PhysRevMaterials.3.104416">10.1103/PhysRevMaterials.3.104416</a>               |
| 130 | (CoZnFeMnNi) <sub>3</sub> O <sub>4</sub>                                                                          | Spinel                   | Fd-3m |  |  | Single | <a href="https://doi.org/10.1016/j.immm.2021.168123">10.1016/j.immm.2021.168123</a>                             |
| 131 | (ZnCuMgCo)Al <sub>2</sub> O <sub>4</sub>                                                                          | Spinel                   | Fd-3m |  |  | Single | <a href="https://doi.org/10.1515/zpch-2021-3106">10.1515/zpch-2021-3106</a>                                     |
| 132 | (CoCrFeMnNi) <sub>3</sub> O <sub>4</sub>                                                                          | Spinel                   | Fd-3m |  |  | Single | <a href="https://doi.org/10.1103/PhysRevMaterials.3.104416">10.1103/PhysRevMaterials.3.104416</a>               |
| 133 | (CoCuMgMnNi)Fe <sub>2</sub> O <sub>4</sub>                                                                        | Spinel                   | Fd-3m |  |  | Single | <a href="https://doi.org/10.1103/PhysRevMaterials.3.104416">10.1103/PhysRevMaterials.3.104416</a>               |
| 134 | (CoCuFeMnNi)Fe <sub>2</sub> O <sub>4</sub>                                                                        | Spinel                   | Fd-3m |  |  | Single | <a href="https://doi.org/10.1103/PhysRevMaterials.3.104416">10.1103/PhysRevMaterials.3.104416</a>               |
| 135 | (CoCuMgNiZn)Fe <sub>2</sub> O <sub>4</sub>                                                                        | Spinel                   | Fd-3m |  |  | Single | <a href="https://doi.org/10.1103/PhysRevMaterials.3.104416">10.1103/PhysRevMaterials.3.104416</a>               |
| 136 | (CoCuMgMnNi)Cr <sub>2</sub> O <sub>4</sub>                                                                        | Spinel                   | Fd-3m |  |  | Single | <a href="https://doi.org/10.1103/PhysRevMaterials.3.104416">10.1103/PhysRevMaterials.3.104416</a>               |
| 137 | (HfZrCeY)O <sub>2</sub>                                                                                           | Fluorite                 | Fm-3m |  |  | Single | <a href="https://doi.org/10.1016/j.jeurceramsoc.2018.04.010">10.1016/j.jeurceramsoc.2018.04.010</a>             |
| 138 | (Hf <sub>0.25</sub> Zr <sub>0.25</sub> Ce <sub>0.25</sub> Yb <sub>0.125</sub> Yb <sub>0.125</sub> )O <sub>2</sub> | Fluorite                 | Fm-3m |  |  | Single | <a href="https://doi.org/10.1016/j.jeurceramsoc.2018.04.010">10.1016/j.jeurceramsoc.2018.04.010</a>             |
| 139 | (HfZrCeYb)O <sub>2</sub>                                                                                          | Fluorite                 | Fm-3m |  |  | Single | <a href="https://doi.org/10.1016/j.jeurceramsoc.2018.04.010">10.1016/j.jeurceramsoc.2018.04.010</a>             |
| 140 | (Hf <sub>0.25</sub> Zr <sub>0.25</sub> Ce <sub>0.25</sub> Yb <sub>0.125</sub> Ca <sub>0.125</sub> )O <sub>2</sub> | Fluorite                 | Fm-3m |  |  | Single | <a href="https://doi.org/10.1016/j.jeurceramsoc.2018.04.010">10.1016/j.jeurceramsoc.2018.04.010</a>             |
| 141 | (Hf <sub>0.25</sub> Zr <sub>0.25</sub> Ce <sub>0.25</sub> Yb <sub>0.125</sub> Gd <sub>0.125</sub> )O <sub>2</sub> | Fluorite                 | Fm-3m |  |  | Single | <a href="https://doi.org/10.1016/j.jeurceramsoc.2018.04.010">10.1016/j.jeurceramsoc.2018.04.010</a>             |
| 142 | (HfZrCeYbGd)O <sub>2</sub>                                                                                        | Fluorite                 | Fm-3m |  |  | Single | <a href="https://doi.org/10.1016/j.jeurceramsoc.2018.04.010">10.1016/j.jeurceramsoc.2018.04.010</a>             |
| 143 | (Hf <sub>0.25</sub> Zr <sub>0.25</sub> Ce <sub>0.25</sub> Yb <sub>0.125</sub> Gd <sub>0.125</sub> )O <sub>2</sub> | Fluorite                 | Fm-3m |  |  | Single | <a href="https://doi.org/10.1016/j.jeurceramsoc.2018.04.010">10.1016/j.jeurceramsoc.2018.04.010</a>             |
| 144 | (HfZrCeYbGd)O <sub>2</sub>                                                                                        | Fluorite                 | Fm-3m |  |  | Single | <a href="https://doi.org/10.1016/j.jeurceramsoc.2018.04.010">10.1016/j.jeurceramsoc.2018.04.010</a>             |
| 145 | (Zr <sub>0.942</sub> Y <sub>0.058</sub> )O <sub>2</sub>                                                           | Fluorite                 | Fm-3m |  |  | Single | <a href="https://doi.org/10.1016/j.jeurceramsoc.2020.01.015">10.1016/j.jeurceramsoc.2020.01.015</a>             |
| 146 | (Zr <sub>0.852</sub> Y <sub>0.148</sub> )O <sub>2</sub>                                                           | Fluorite                 | Fm-3m |  |  | Single | <a href="https://doi.org/10.1016/j.jeurceramsoc.2020.01.015">10.1016/j.jeurceramsoc.2020.01.015</a>             |
| 147 | (HfZrCeY <sub>0.25</sub> Yb <sub>0.25</sub> )O <sub>2</sub>                                                       | Fluorite                 | Fm-3m |  |  | Single | <a href="https://doi.org/10.1016/j.jeurceramsoc.2020.01.015">10.1016/j.jeurceramsoc.2020.01.015</a>             |
| 148 | (HfZrCeYb)O <sub>2</sub>                                                                                          | Fluorite                 | Fm-3m |  |  | Single | <a href="https://doi.org/10.1016/j.jeurceramsoc.2020.01.015">10.1016/j.jeurceramsoc.2020.01.015</a>             |
| 149 | (HfZrCeY <sub>0.09</sub> Ca <sub>0.09</sub> )O <sub>2</sub>                                                       | Fluorite                 | Fm-3m |  |  | Single | <a href="https://doi.org/10.1016/j.jeurceramsoc.2020.01.015">10.1016/j.jeurceramsoc.2020.01.015</a>             |
| 150 | (HfZrCeY <sub>0.25</sub> Ca <sub>0.25</sub> )O <sub>2</sub>                                                       | Fluorite                 | Fm-3m |  |  | Single | <a href="https://doi.org/10.1016/j.jeurceramsoc.2020.01.015">10.1016/j.jeurceramsoc.2020.01.015</a>             |
| 151 | (HfZrCeY <sub>0.25</sub> Gd <sub>0.25</sub> )O <sub>2</sub>                                                       | Fluorite                 | Fm-3m |  |  | Single | <a href="https://doi.org/10.1016/j.jeurceramsoc.2020.01.015">10.1016/j.jeurceramsoc.2020.01.015</a>             |
| 152 | (HfZrCeYbGd)O <sub>2</sub>                                                                                        | Fluorite                 | Fm-3m |  |  | Single | <a href="https://doi.org/10.1016/j.jeurceramsoc.2020.01.015">10.1016/j.jeurceramsoc.2020.01.015</a>             |
| 153 | (GdLaNdSmY)(CoCrFeMnNi)O <sub>3</sub>                                                                             | Perovskite - Orthohombic | Pbnm  |  |  | Single | <a href="https://doi.org/10.1016/j.scriptamat.2019.02.039">10.1016/j.scriptamat.2019.02.039</a>                 |
| 154 | Gd(CoCrFeMnNi)O <sub>3</sub>                                                                                      | Perovskite - Orthohombic | Pbnm  |  |  | Single | <a href="https://doi.org/10.1103/PhysRevMaterials.3.034406">10.1103/PhysRevMaterials.3.034406</a>               |
| 155 | Nd(CoCrFeMnNi)O <sub>3</sub>                                                                                      | Perovskite - Orthohombic | Pbnm  |  |  | Single | <a href="https://doi.org/10.1103/PhysRevMaterials.3.034406">10.1103/PhysRevMaterials.3.034406</a>               |
| 156 | Sm(CoCrFeMnNi)O <sub>3</sub>                                                                                      | Perovskite - Orthohombic | Pbnm  |  |  | Single | <a href="https://doi.org/10.1103/PhysRevMaterials.3.034406">10.1103/PhysRevMaterials.3.034406</a>               |
| 157 | Y(CoCrFeMnNi)O <sub>3</sub>                                                                                       | Perovskite - Orthohombic | Pbnm  |  |  | Single | <a href="https://doi.org/10.1103/PhysRevMaterials.3.034406">10.1103/PhysRevMaterials.3.034406</a>               |
